# Supplementary material for: Characterization of a New Member of Alphacoronavirus with Unique Genomic Features in Rhinolophus Bats
Source: MDPI journal article supplement (doi:10.3390/v11040379), 2019-04-24
Supplement: s1 [file s1]

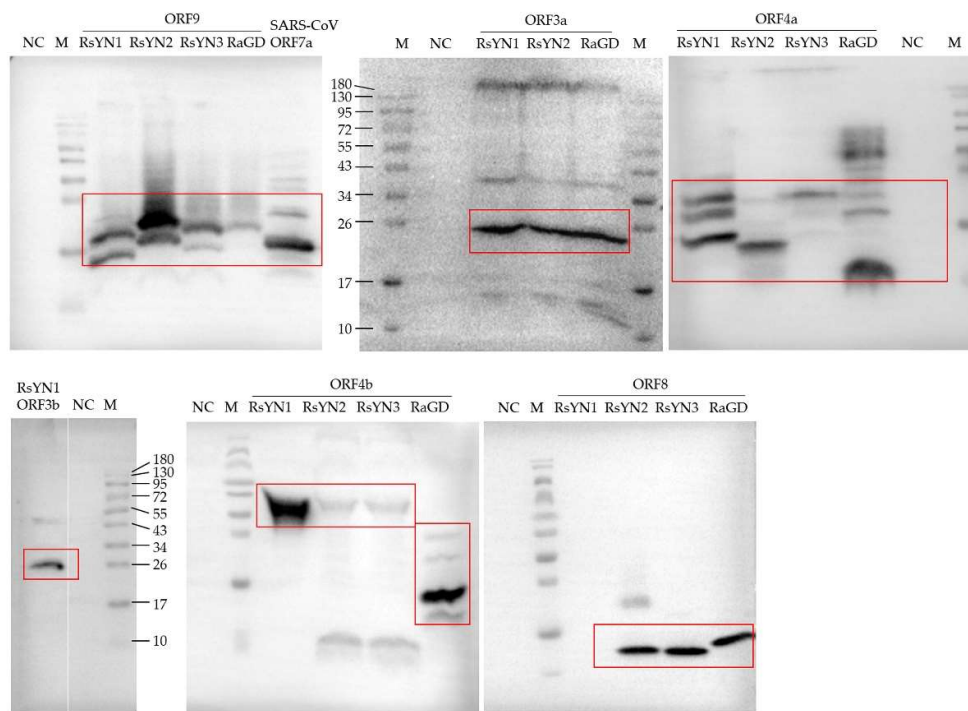

Supplementary Figure S1: western blot analysis the expression of accessory proteins. The HA-tagged proteins were detected with mAb against the HA tag. The bands circled in the red boxes indicate the expected proteins.

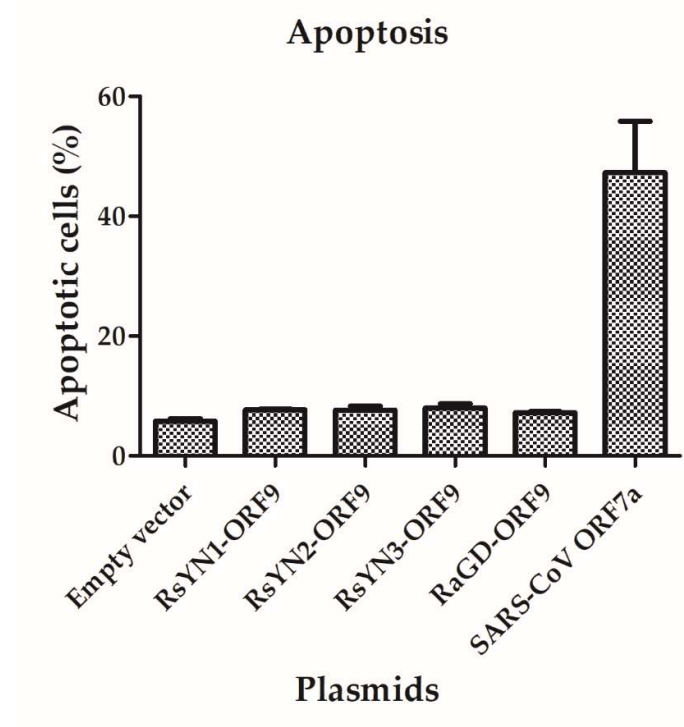

Sypplementary Figure S2. Apoptosis analysis of ORF9 proteins of BtCoV/Rh/YN2012. HEK293T cells were transfected with expression plasmids encoding ORF9 of different strains of BtCoV/Rh/YN2012, ORF7a of SARS-CoV Tor2, or pcAGGS vector for 24 h. Apoptosis was analyzed by flow cytometry after annexin V staining, and the percentage of apoptosis cells was calculated. Data are shown as the average from triplicate cell samples. Error bars indicate SDs.

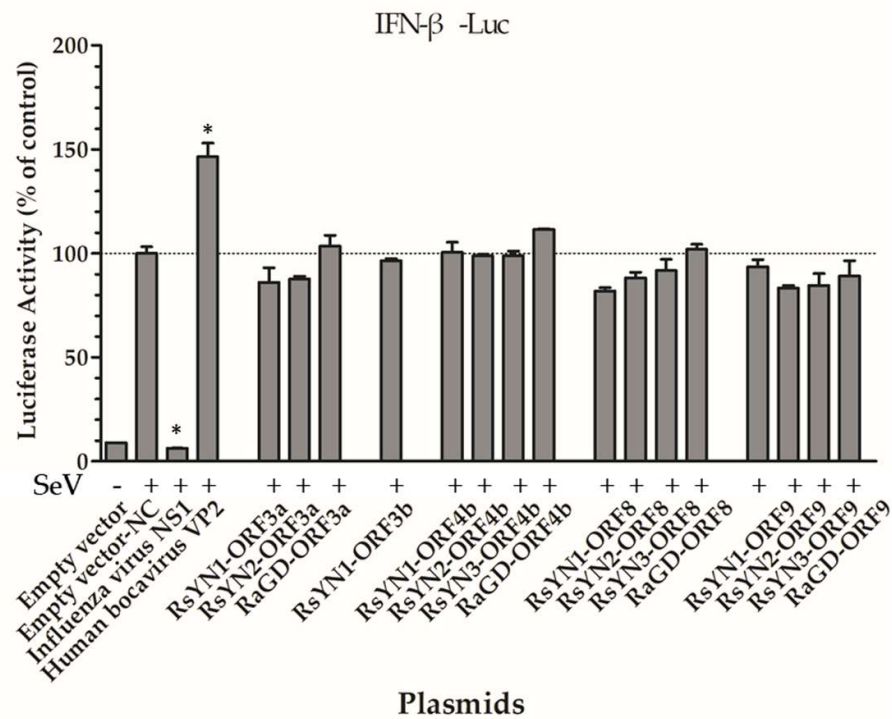

Supplementary Figure S3. Functional analysis of ORF3a, ORF3b, ORF4b, ORF8 and ORF9 proteins on the production of Type I interferon. 293T cells seeded in 24-well plates were transfected with 100 ng pIFN- $\beta$ -Luc, 5 ng pRL-TK, empty vector (625 ng), an influenza A NS1-expressing plasmid (625 ng), an human bocavirus VP2-expressing plasmid (625 ng), or accessory gene-expressing plasmids (625 ng). The cells were infected with Sendi virus (100 hemagglutinating units/ml) at 24 h posttransfection. Samples were collected at 6 h postinfection, followed by dual-luciferase assay. The results were expressed as the firefly luciferase value normalized to that of Renilla luciferase. Data are averages plus standard deviation for three experiments. Asterisks indicate significant differences between groups (compared with Empty vector-NC).

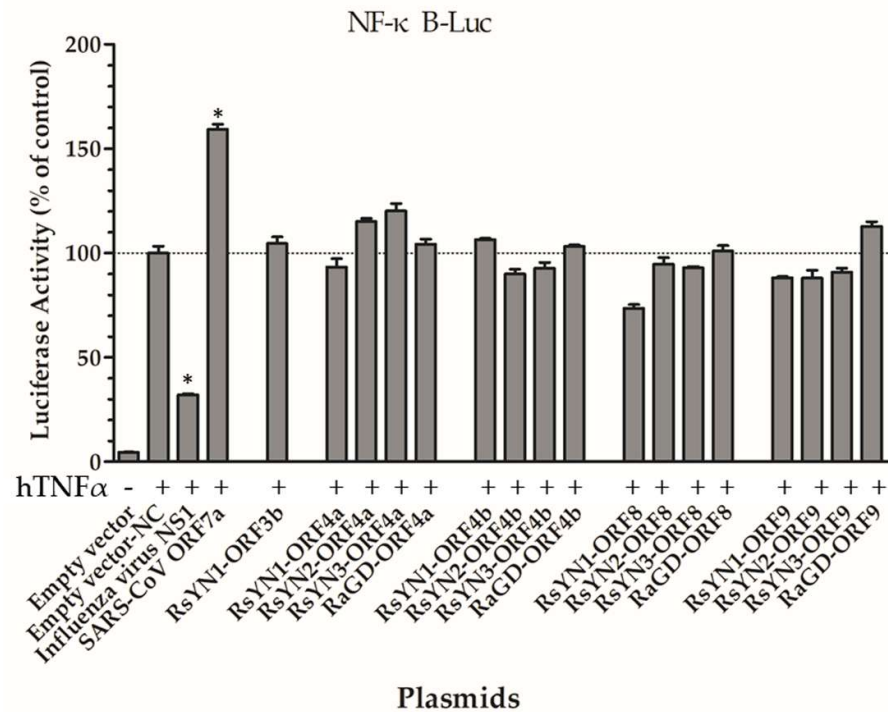

Supplementary Figure S4. Functional analysis of ORF3b, ORF4a, ORF4b, ORF8 and ORF9 proteins on the production of NF- $\kappa$ B. 293T cells were transfected with 100 ng pNF- $\kappa$ B-Luc, 10 ng pRL-TK, empty vector (500 ng), an NS1-expressing plasmid (500 ng), an SARS-CoV ORF7a-expressing plasmid (500 ng), or accessory genes-expressing plasmids (500 ng). After 24 h, the cells were treated with TNF- $\alpha$ . Dual-luciferase activity was determined after 6 h. The results were expressed as the firefly luciferase activity normalized to that of Renilla luciferase. Data are averages plus standard deviation for three experiments. Asterisks indicate significant differences between groups (compared with Empty vector-NC).

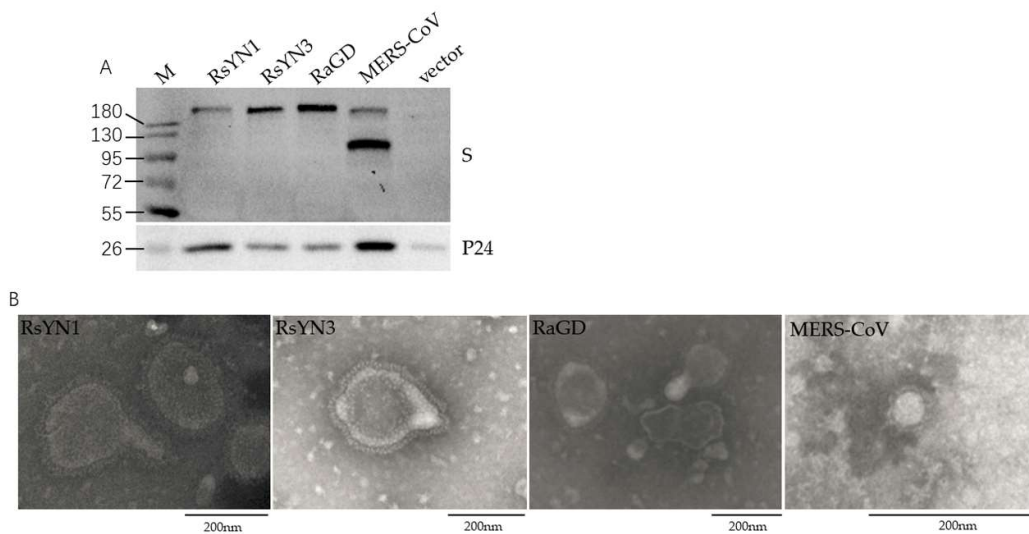

Supplementary Figure S5. Characteristic of BtCoV/Rh/YN2012 spike mediated pseudovirus. (A) Western blot analysis the protein expression of pseudovirus in the medium supernatant. (B) Electron-microscopical observation of negative-stain coronavirus particles. The bars represent 200nm.

**Table S1. General primers for AlphaCoVs genome sequencing**

| Primers                 | Primer sequence (5'-3')   |
|-------------------------|---------------------------|
| $\alpha$ CoV 5UTR 64 F1 | CTMCTCAWYTCAACTAAACGA     |
| $\alpha$ CoV 1 a770 R1  | STCCAATCACCAACAGTCCA      |
| $\alpha$ CoV 5UTR 275F2 | TCTTGTYTGAAACCWGTAAGTGT   |
| $\alpha$ CoV 1a 674 R2  | CCATTABYMAYAAAAGGAGAACCAA |
| aCoV 1a 12013 F1        | ATGYTNDCHAATGGYTCTGG      |
| aCoV 1b 448 R1          | TCRTTYTCWACDGGRTCAWACCA   |
| aCoV 1a 12076 F2        | CARGAYWSTTATGGTGGTGCITC   |
| aCoV 1b 202 R2          | ATAHATGGAYTGCTCRTGBTCCAT  |
| aCoV 1b 1810 F1         | NATGGGHTGGGAYTAYCCIAA     |
| aCoV 1b 3895 R1         | ARRTCRTARTTMGTRCACATIGA   |
| aCoV 1b 1999 F2         | CCWGGTGGTACIACHTCIGGTGA   |
| aCoV 1b 3613 R2         | TGNGAYTTDCCACTACCAGGIGG   |
| $\alpha$ CoV_18377_F1   | GAAGGYDBYAATGGTGGTTC      |
| $\alpha$ CoV_19745_R1   | GGCATRGWRTAVCCRCAYTTCCA   |
| $\alpha$ CoV_18425_F2   | ACACCWGCWTWTGAYAARCGTGC   |
| $\alpha$ CoV_19682_R2   | YCYTTACACCAHARCATCCA      |
| $\alpha$ CoV S23347 F1  | BHTGTGYICAGTATTAYAAAYGG   |
| $\alpha$ CoV S25782 R1  | GCMAGIACDARIGGCCAIA       |
| $\alpha$ CoV S23367 F2  | GHATHATGGTDYTICIGGTGT     |
| $\alpha$ CoV S24521 R2  | ARCCAHACVYACCAIGGCCA      |

|                      |                         |
|----------------------|-------------------------|
| $\alpha$ CoV M271 F1 | ACRCTYRTGCTGTGGATAATGTA |
| $\alpha$ CoV N950 R1 | CNTYRCYACCAAACAGCA      |
| $\alpha$ CoV M452 F2 | TRGARGGCWWTAAGGTTGCTAC  |
| $\alpha$ CoV N157 R2 | TTGHTCADTCCARTAKCCAAT   |

The primers were designed targeting the conserved regions of the genomes. Nested PCR primers were designed in this experiment. Primer pairs F1/R1 for the first round PCR and F2/R2 for the second round PCR.

**Table S1. Primers for the detection of viral sugbenomic mRNAs**

| Primers          | Primer sequence (5'-3')   |
|------------------|---------------------------|
| RsYN1 sg F1      | CATGGGGACTTAAAGTACATATCT  |
| RsYN1 sg F2      | AGAGTGTGTTCTTTCTAGACCTC   |
| RsYN1 1ab 658R1  | GCACTCCAACAGCATCATACA     |
| RsYN1 1ab 542R2  | GTGCCACACCAAGTGATAGC      |
| RsYN1 sgS 694R1  | GGAAGCCATTACAGTCATCACA    |
| RsYN1 sgS 505R2  | CAACATTAGAGGACCAGGTAACAC  |
| RsYN1 sg3a 553R1 | GCTCAACACGCCTAACTAAGG     |
| RsYN1 sg3a 452R2 | CGCACATAATGTTCTCCTCCAA    |
| RsYN1 sg4a 307R1 | GTGGTGTATTAGGTCTAACGATGT  |
| RsYN1 sg4a 157R2 | TAGGGTTGAAAGAATGACTACTCTG |
| RsYN1 sg4b 334R1 | GGAATTGAAGTGGTGTGCTTAA    |
| RsYN1 sg4b 286R2 | CACTACTGAATGAGTACCATTGTTG |
| RsYN1 sgE 213R1  | AACGGGACAGGGCGCAATT       |
| RsYN1 sgE 140R2  | TGGGACATAAGCCTGTGACA      |
| RsYN1 sgM 540R1  | AATGATAGTGGTAGTTGGCTTGG   |
| RsYN1 sgM 441R2  | ACTAAGAACAGTGAGCGTAATGC   |
| RsYN1 sgN 626R1  | GCCTGTGAATTGTTAGACTGGTT   |
| RsYN1 sgN 501R2  | ACCACTAGAAGCAGAGCGATT     |
| RsYN1 sg8 97R1   | AACTATTATAGAGCTGTCCAACGAC |
| RsYN1 sg8 80 R2  | CCAACGACAAGCTCGAAGAA      |
| RsYN1 sg9 285R1  | TTGTGAGTAGCGAGTGTGAGT     |
| RsYN1 sg9 258R2  | GCTGACAGGTCTAACATGATAAGT  |
| RsYN2 sg 2F      | CATGGGGACTTAAAGTACATATCT  |
| RsYN2 sg 36F     | AGAGTGTGTTCTTTCTAGACCTC   |
| RsYN2 sg1ab 589R | GTGAAGCAACAGCCGTAGTG      |
| RsYN2 sg1ab 541R | TTCCACACCAAGTGATAGCATT    |
| RsYN2 sgS 696R   | CTCGCACACGCTATATTCCTTA    |
| RsYN2 sgS 525R   | AGTGACATAATTAGAGGACCAAGTG |
| RsYN2 sg3a 559R  | GTTCAACTCGTCTAACAAGTGGTA  |
| RsYN2 sg3a 435R  | CATTACGATGTATGGTTGGTCTTC  |

|                 |                           |
|-----------------|---------------------------|
| RsYN2 sg3b 316R | CTAGAAGCAGTGGTATGTTAGGTT  |
| RsYN2 sg3b 275R | ATGGACACGTAACCACTCTCA     |
| RsYN2 sg3c 386R | GCAAGTAGCAGGAAGTAATAATGTC |
| RsYN2 sg3c 330R | GTTAGTAGTAGGGCTCTGTGTTG   |
| RsYN2 sgE 224R  | TAAACATCTAAGACGGGACAGG    |
| RsYN2 sgE 151R  | CGTAAACCGTGTTGGACATAAG    |
| RsYN2 sgM 590R  | CCTGTGTTGGAACGAGTGTT      |
| RsYN2 sgM 447R  | ACTTAGAACAGTGAGCGTGATG    |
| RsYN2 sgN 637R  | CCTGTGTTCTGTGGTTGAC       |
| RsYN2 sgN 471R  | ACTGCGATCACGGTTGGTA       |
| RsYN2 sg7a 259R | AAGCCGAGCTATACAACCTGTG    |
| RsYN2sg7a 197R  | ACTGGACAGAATATTGGTGGTAATG |
| RsYN2 sg7b 310R | GGCACTGCAACTCATTACCTT     |
| RsYN2 sg7b 282R | GGAGTAGCGTGATGTGTTCTG     |

|                  |                           |
|------------------|---------------------------|
| RsYN3 sg 2F1     | CATGGGGACTTAAAGTACATATCT  |
| RsYN3 sg 36F2    | AGAGTGTGTTCTTTCTAGACCTC   |
| RsYN3 1ab 589R1  | GTGAAGCAACAGCCGTAGTG      |
| RsYN3 1ab 541R2  | TTCCACACCAAGTGATAGCATT    |
| RsYN3 sgS 665R1  | CGTGCATTAGTTGTGATGTTGAG   |
| RsYN3 sgS 514R2  | TAGAAGACCAAGTAACGCCAAG    |
| RsYN3 sg3a 559R1 | GTTCAACTCGTCTAACAAGTGGTA  |
| RsYN3 sg3a 435R2 | CATTACGATGTATGGTTGGTCTTC  |
| RsYN3 sg4a 316R1 | CTAGAAGCAGTGGTATGTTAGGTT  |
| RsYN3 sg4a 275R2 | ATGGACACGTAACCACTCTCA     |
| RsYN3 sg4b 386R1 | GCAAGTAGCAGGAAGTAATAATGTC |
| RsYN3 sg4b 330R2 | GTTAGTAGTAGGGCTGTGTGTTG   |
| RsYN3 sgE 224R1  | TAAACATCTAAGACGGGACAGG    |
| RsYN3 sgE 151R2  | CGTAAACCGTGTTGGACATAAG    |
| RsYN3 sgM 590R1  | CCTGTGTTGGAACGAGTGTT      |
| RsYN3 sgM 447R2  | ACTTAGAACAGTGAGCGTGATG    |
| RsYN3 sgN 637R1  | CCTGTGTTCTGTGGTTGAC       |
| RsYN3 sgN 471R2  | ACTGCGATCACGGTTGGTA       |
| RsYN3 sg8 199R1  | AAACTGGTAGGAACACTGGG      |
| RsYN3 sg8 142R2  | CTAAGTTAGCATCAAGCACCTT    |
| RsYN3 sg9 344R1  | AGCAGGATGAGAAGAATCACAAG   |
| RsYN3 sg9 275R2  | GAATAACGAGTGTGCGTCCTAA    |

|                |                           |
|----------------|---------------------------|
| RsGD sg 2F1    | CATGGGGACTTAAAGATATTATCT  |
| RsGD sg 40F2   | GTGTCTTTCTTAGACCTCGTGTC   |
| RsGD 1ab 491R1 | GGAACATCAACACGGTCAACA     |
| RsGD 1ab 463R2 | CCTTAGTATATGTGGTGCCATTCA  |
| RsGD sgS 530R1 | GACCATGTAACACCTAAGACTTGA  |
| RsGD sgS 455R2 | CCTCTATTGTGGTTTGGTGATAAGT |

|                  |                          |
|------------------|--------------------------|
| RsGD sg3a 533R1  | ACACATCTAGTAAGTGGTACATCC |
| RsGD sg3a 488R2  | AACATCAGCAGCAACCACAA     |
| RsGD sg4ab 412R1 | CTAGCGGTAGCAGGTAATATAGTC |
| RsGDsg4ab 323R2  | GGCTGTGTAATGGCTGTTGATT   |
| RsGD sgE 168R1   | AGCATTATGAACAGGCACAT     |
| RsGD sgE 154R2   | GCACATAAACTGTGTTGGACAT   |
| RsGD sgM 575R1   | GCGACTGTGATGTATGTAGGTAAT |
| RsGD sgM 489R2   | TGTGAGCGTAATGCCAGTTG     |
| RsGD sgN 480R1   | CGAACGATTAGCAGACTGTGAA   |
| RsGD sgN 339R2   | GCCAAGTGAAGTAGGTTGAGTT   |
| RsGD sg8 245R1   | AGCAAACCAGCAATCAAGTCTA   |
| RsGD sg8 193R2   | GCCAGAAGACAGGTAGAAGTAC   |
| RsGD sg9 357R1   | CCAGAGGCAAACATAAAGGACTAA |
| RsGD sg9 283R2   | GTGTGACTCTGACATTAGTTCTG  |

The forward primers were designed targeting the leader sequence at the 5'-end of the complete genome. The reverse primers were designed within ORFs of corresponding gene. Nested PCR primers were designed in this experiment.

**Table S3.** Different cell line susceptibility to BtCoV/Rh/YN2012 RsYN1-, RsYN3-, RaGD- and MERS-CoV-spike mediated pseudovirus.

| Cell lines          | RsYN1 | RsYN3 | RaGD | MERS-CoV |
|---------------------|-------|-------|------|----------|
| Human               |       |       |      |          |
| Respiratory tract   |       |       |      |          |
| Hep-2               | -     | -     | -    | -        |
| A549                | -     | -     | -    | +/-      |
| Calu-3              | -     | -     | -    | ++       |
| H292                | -     | -     | -    | -        |
| Intestinal tract    |       |       |      |          |
| Caco-2              | -     | -     | -    | ++++     |
| Liver               |       |       |      |          |
| Huh-7               | +/-   | -     | -    | ++++     |
| Genitourinary tract |       |       |      |          |
| Hela                | -     | -     | -    | -        |
| HEK-293T            | -     | -     | -    | +/-      |
| Muscle cell         |       |       |      |          |
| RD                  | -     | -     | -    | -        |
| Nerve cell          |       |       |      |          |
| CCF-STTG1           | -     | -     | -    | -        |
| Immune cell         |       |       |      |          |
| THP-1               | -     | -     | -    | -        |
| Bats                |       |       |      |          |
| RsKT                | -     | -     | -    | +        |
| RsLu4323            | -     | -     | -    | ++       |
| RsBrT               | -     | -     | -    | -        |



|               |   |   |   |    |
|---------------|---|---|---|----|
| RIKT          | - | - | - | -  |
| HpLuT         | - | - | - | -  |
| Tb1-Lu        | - | - | - | -  |
| RaK4324       | - | - | - | -  |
| Paki          | - | - | - | -  |
| Other mammals |   |   |   |    |
| LLC-MK2       | - | - | - | ++ |
| Vero          | - | - | - | ++ |
| BHK21         | - | - | - | -  |
| MDCK          | - | - | - | -  |
| FK            | - | - | - | -  |
| PK15          | - | - | - | -  |
| SIEC          | - | - | - | -  |
| NIH-3T3       | - | - | - | -  |
| V79           | - | - | - | -  |

---

Note: The luciferase signal intensity was normalized to fold changes compared to mock. “-”, <2-fold increase; “+/-”, 2-5 fold increase; “+”5-20 fold increase, “++” 20-100 fold increase, “++++”, >1000 fold increase.
